# Supplementary material for: Evolutionary trajectory of leukemic clones and its clinical implications
Source: PubMed Central journal article supplement — Haematologica. 2019 Apr 18;104(5):872–80. doi: 10.3324/haematol.2018.195289 (PMC6518877; doi:10.3324/haematol.2018.195289), 2019-05
Supplement: 2018_195289-Disclosures_and_Contributions.pdf [file 2018_195289-Disclosures_and_Contributions.pdf]

Haematologica  
HAEMATOL/2018/195289  
Version 3

Evolutionary trajectory of leukemic clones and its clinical implications

Amos Tuval and Liran I. Shlush

Disclosures: Nothing to disclose

Contributions: Authors equally contributed
