# Supplementary figures and images for: Evolutionary trajectory of leukemic clones and its clinical implications
Source: PubMed Central journal article supplement — Haematologica. 2019 Apr 18;104(5):872–80. doi: 10.3324/haematol.2018.195289 (PMC6518877; doi:10.3324/haematol.2018.195289), 2019-05

# High risk and low risk pre-leukemic somatic mutations

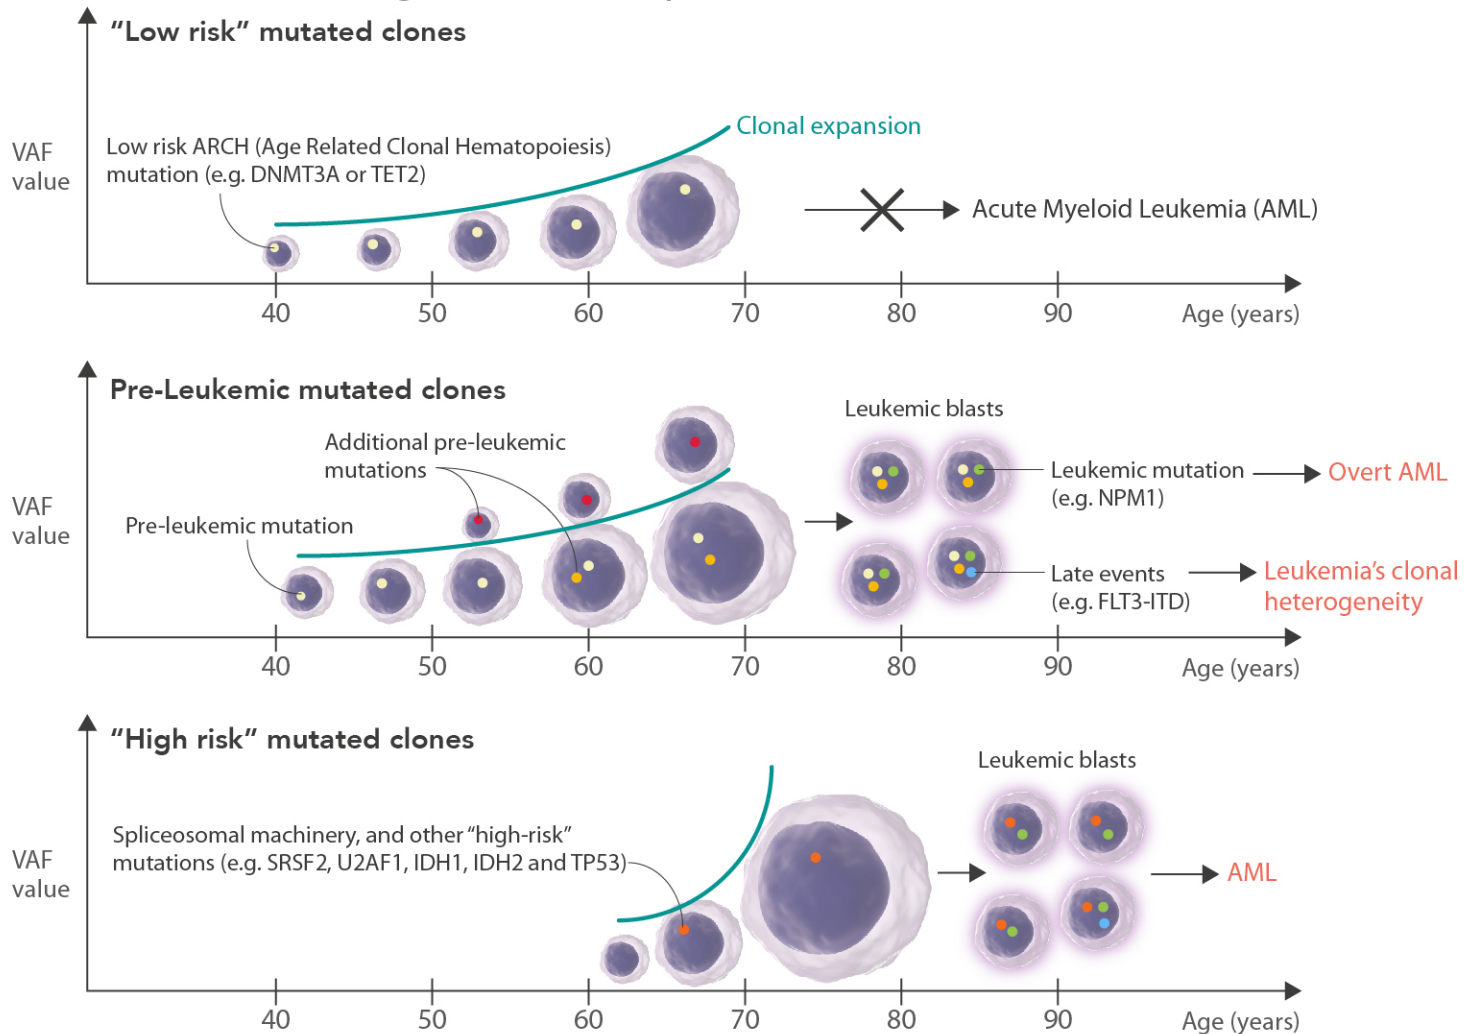

Supplement: HAEMATOL-2018-195289v3-Tuval-01.pdf [file HAEMATOL-2018-195289v3-Tuval-01.pdf]
